# Supplementary material
Source: publisher site journal article supplement (https://www.dovepress.com/article/454539)
Supplement: Supplementary file 1 [file get_supplementary_file.php]

mediXgraph

www.medixgraph.com CFU.Ai v1.4

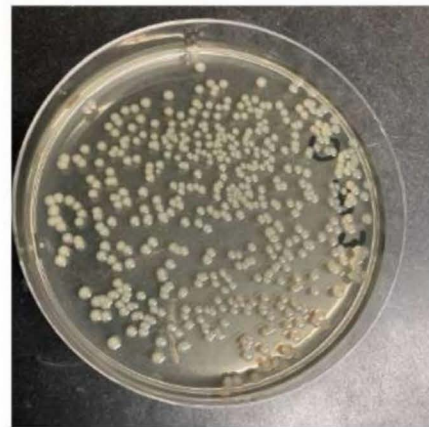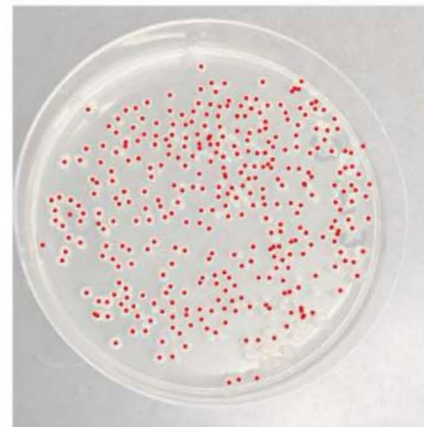

*E. coli* (ATCC#35218) / Control

Supplementary Figure 1: Representative image of *E. coli* on mueller hinton agar (MHA) control medium showing growth of high number of CFUs (count= 348 cfu).

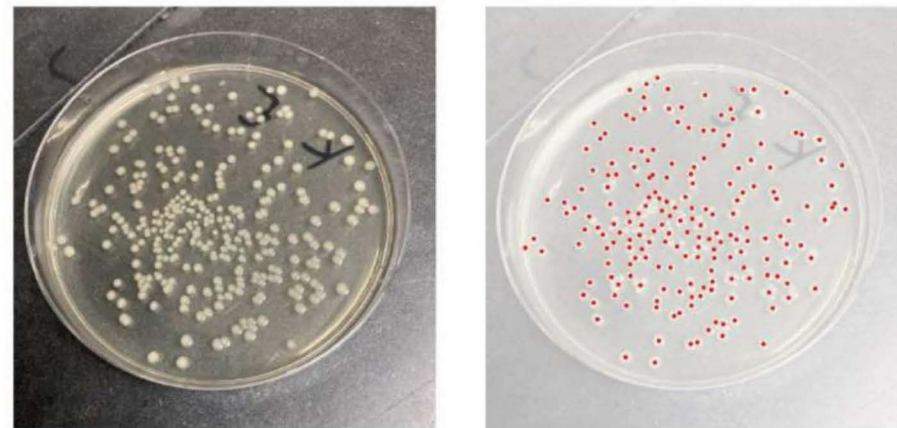

*E. coli* (ATCC# 35218) / ORC K

Supplementary Figure 2: Representative image of *E. coli* on MHA after treatment with ORC K material showing growth of moderate number of CFUs (count= 192 cfu).

mediXgraph

www.medixgraph.com CFU.Ai v1.4

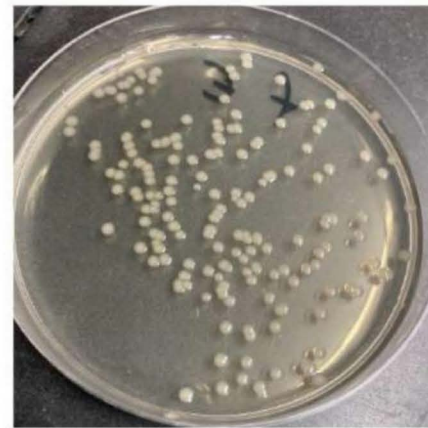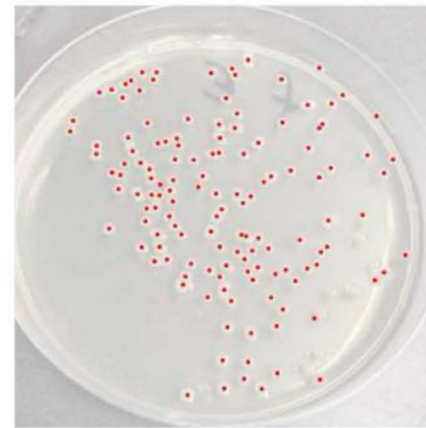

Count : 136

*E. coli* (ATCC# 35218) / ORC F

Supplementary Figure 3: Representative image of *E. coli* on MHA after treatment with ORC F material showing growth of moderate number of CFUs (count= 136 cfu).

mediXgraph

www.medixgraph.com CFU.Ai v1.4

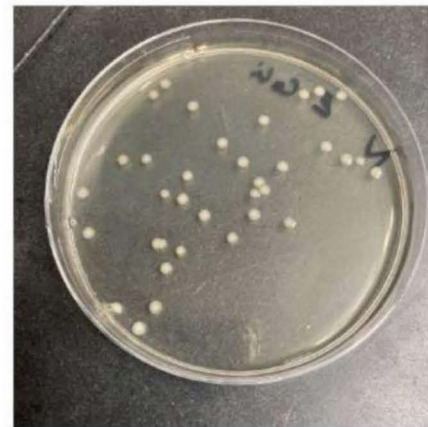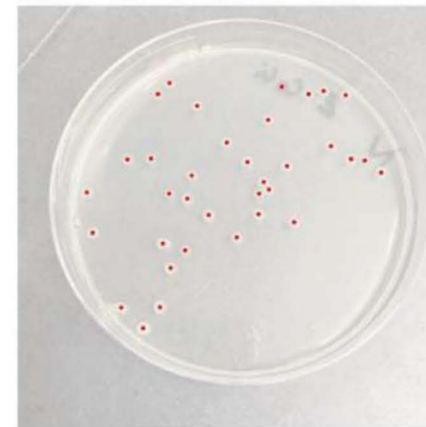

*E. coli* (ATCC# 35218) / ORC N

Supplementary Figure 4: Representative image of *E. coli* on MHA after treatment with ORC N material showing growth of low number of CFUs (count= 35 cfu).



mediXgraph

www.medixgraph.com CFU.Ai v1.4

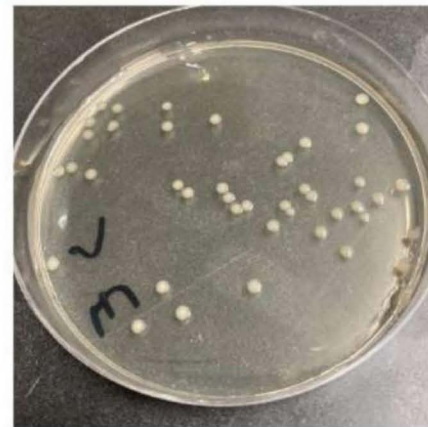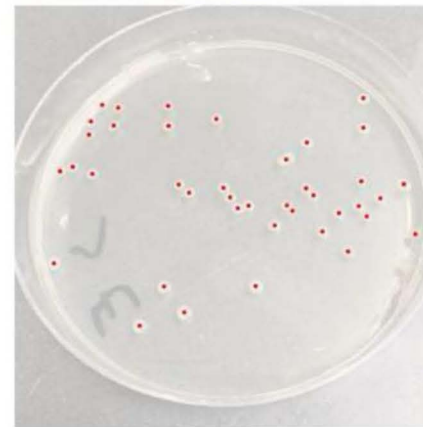

*E. coli* (ATCC# 35218) / ORC S

Supplementary Figure 5: Representative image of *E. coli* on MHA after treatment with ORC S material showing growth of low number of CFUs (count= 40 cfu).

mediXgraph

www.medixgraph.com CFU.Ai v1.4

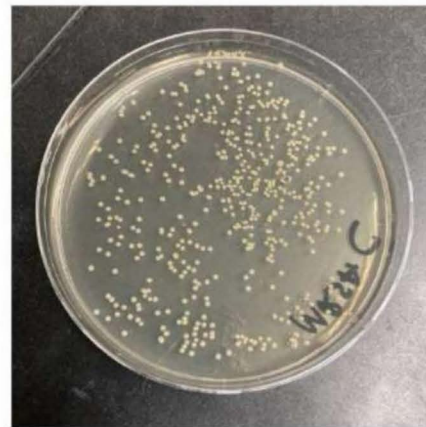

Count : 308

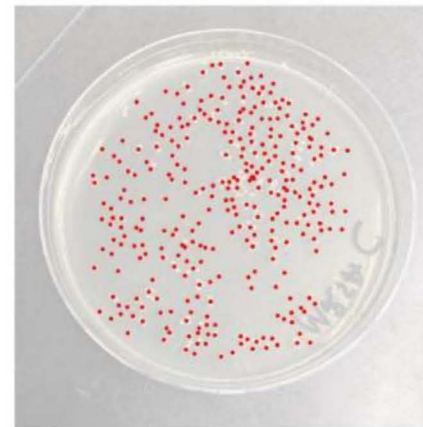

Methicillin-resistant Staphylococcus aureus (ATCC#43300) /Control

Supplementary Figure 6: Representative image of Methicillin-resistant Staphylococcus aureus (MRSA) on MHA control medium showing growth of high number of CFUs (count= 308 cfu).

mediXgraph

www.medixgraph.com CFU.Ai v1.4

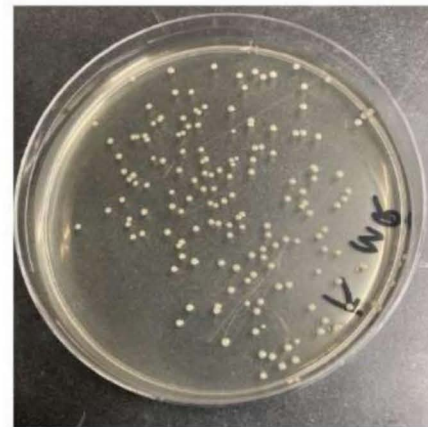

Count : 136

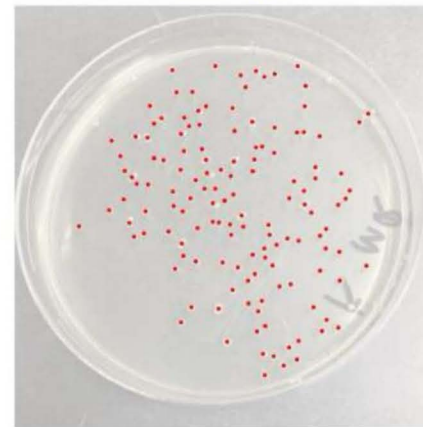

Methicillin-resistant *Staphylococcus aureus* (ATCC#43300) / ORC K

Supplementary Figure 7: Representative image of MRSA on MHA after treatment with ORC K material showing growth of moderate number of CFUs (count= 136 cfu).

mediXgraph

www.medixgraph.com CFU.Ai v1.4

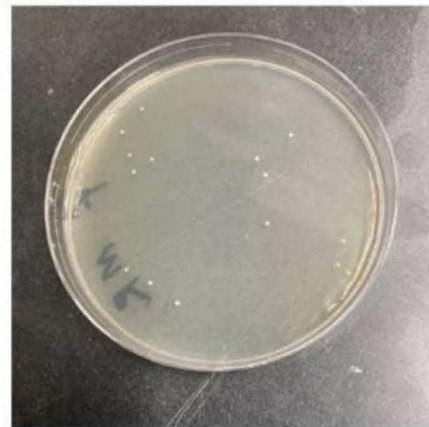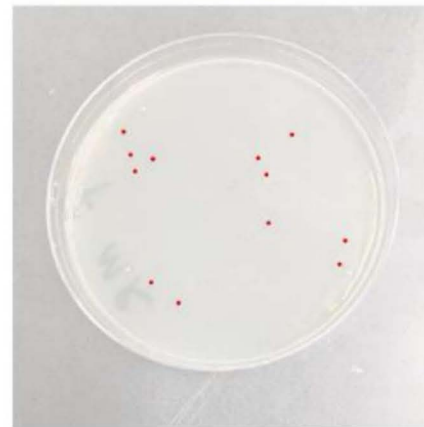

Methicillin-resistant *Staphylococcus aureus* (ATCC#43300) / ORC F

Supplementary Figure 8: Representative image of MRSA on MHA after treatment with ORC F material showing growth of low number of CFUs (count= 12 cfu).

mediXgraph

www.medixgraph.com CFU.Ai v1.4

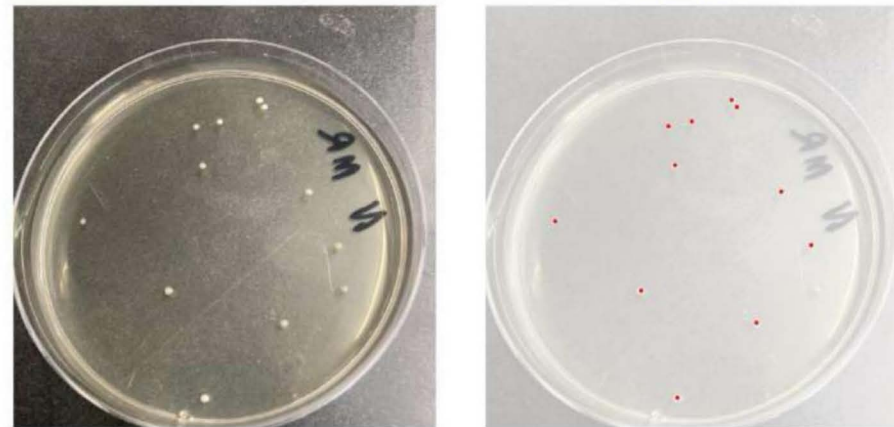

Methicillin-resistant Staphylococcus aureus (ATCC#43300) / ORC N

Supplementary Figure 9: Representative image of MRSA on MHA after treatment with ORC N material showing growth of low number of CFUs (count= 11 cfu).

mediXgraph

www.medixgraph.com CFU.Ai v1.4

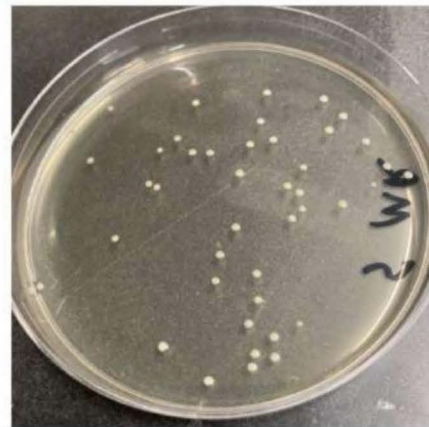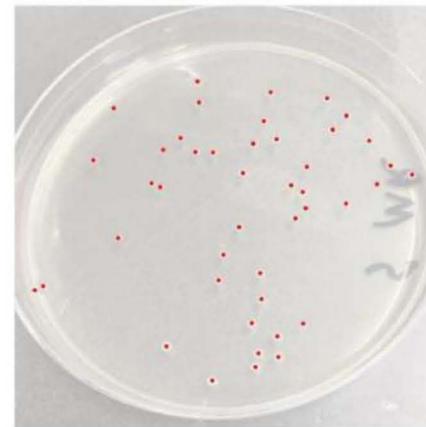

Methicillin-resistant *Staphylococcus aureus* (ATCC#43300) / ORC S

Supplementary Figure 10: Representative image of MRSA on MHA after treatment with ORC S material showing growth of low number of CFUs (count= 44 cfu).

mediXgraph

www.medixgraph.com CFU.Ai v1.4

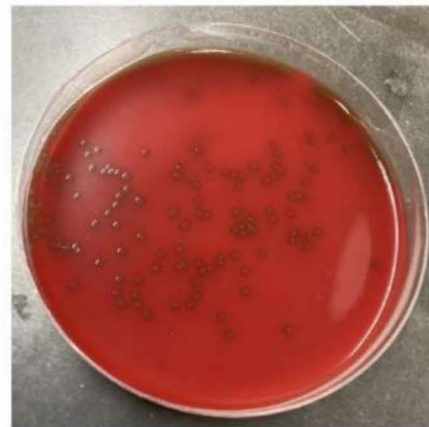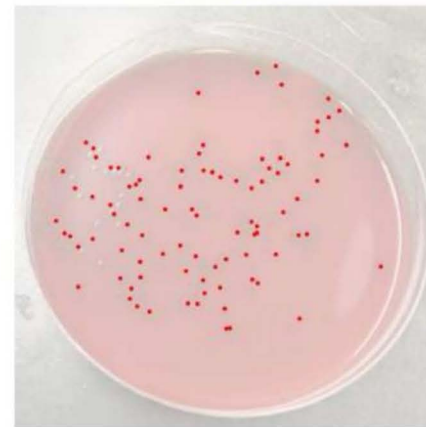

*Streptococcus pneumoniae* (ATCC#49136)/ Control

Supplementary Figure 11: Representative image of *Streptococcus pneumoniae* (*Strept. pneumoniae*) on blood agar control medium showing growth of moderate number of CFUs (count= 92 cfu).



mediXgraph

www.medixgraph.com CFU.Ai v1.4

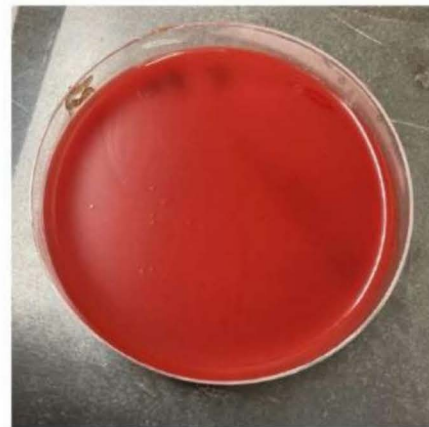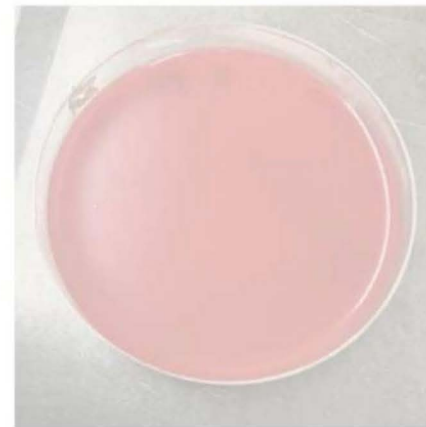

Count : 0

*Streptococcus pneumoniae* (ATCC#49136)/ ORC K

Supplementary Figure 12: Representative image of *Strept. pneumoniae* on blood agar medium after treatment with ORC K material showing no growth (count= 0 cfu).

mediXgraph

www.medixgraph.com CFU.Ai v1.4

Count : 0

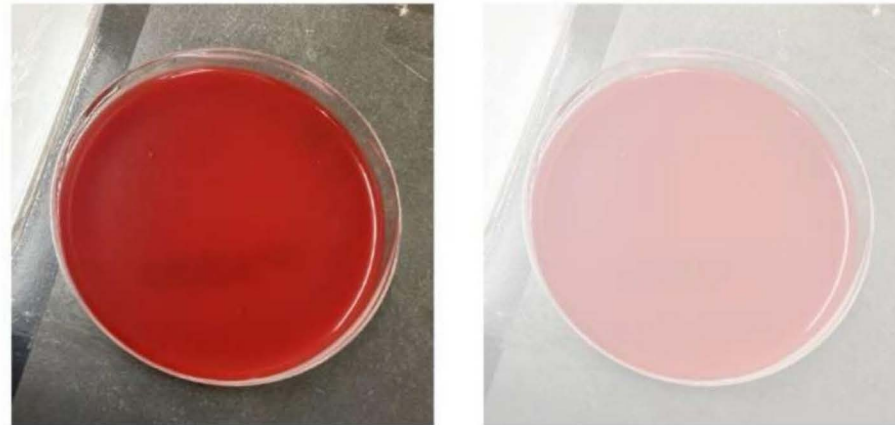

*Streptococcus pneumoniae* (ATCC#49136)/ ORC F

Supplementary Figure 13: Representative image of *Strept. pneumoniae* on blood agar medium after treatment with ORC F material showing no growth (count= 0 cfu).

mediXgraph

www.medixgraph.com CFU.Ai v1.4

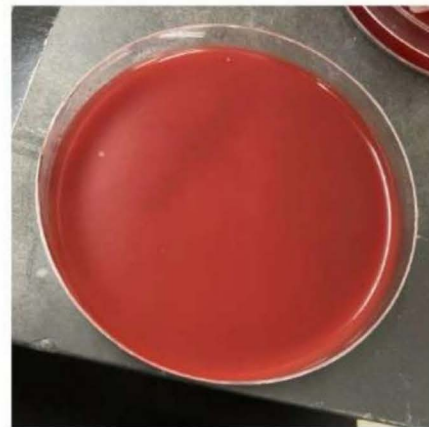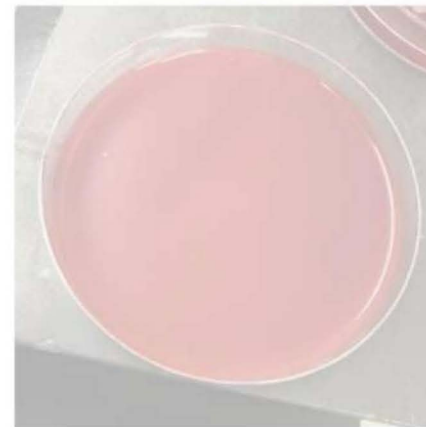

*Streptococcus pneumoniae* (ATCC#49136)/ ORC N

Supplementary Figure 14: Representative image of *Strept. pneumoniae* on blood agar medium after treatment with ORC N material showing no growth (count= 0 cfu).

mediXgraph

www.medixgraph.com CFU.Ai v1.4

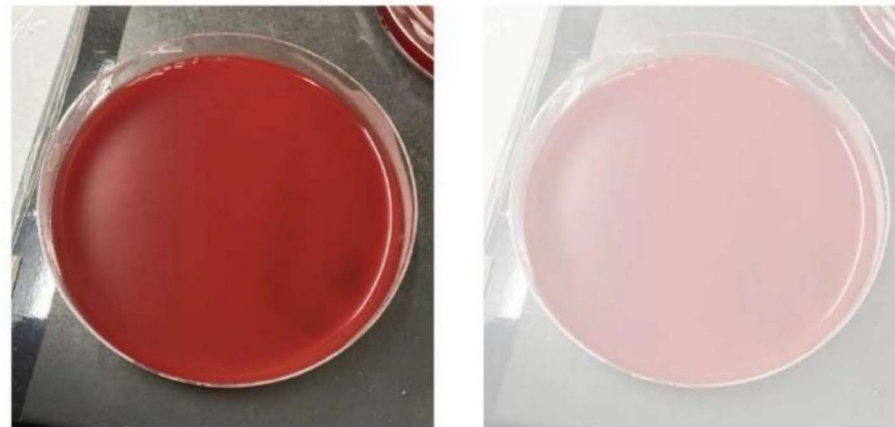

*Streptococcus pneumoniae* (ATCC#49136)/ ORC S

Supplementary Figure 15: Representative image of *Strept. pneumoniae* on blood agar medium after treatment with ORC S material showing no growth (count= 0 cfu).

mediXgraph

www.medixgraph.com CFU.Ai v1.4

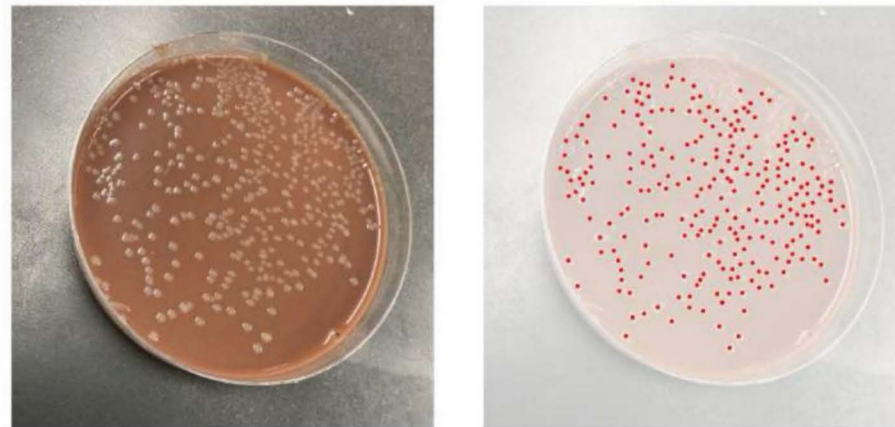

Haemophilus influenzae (ATCC#10211)/ Control

Supplementary Figure 16: Representative image of Haemophilus influenzae (H. influenzae) on chocolate agar control medium showing growth of high number of CFUs (count= 252 cfu).

mediXgraph

www.medixgraph.com CFU.Ai v1.4

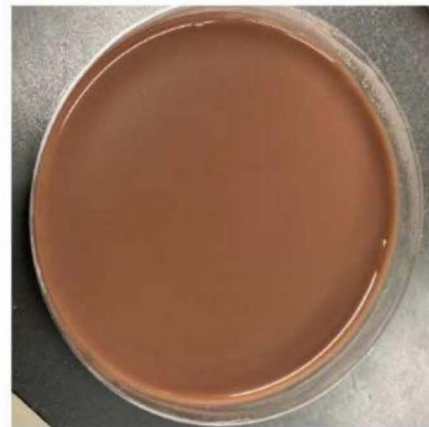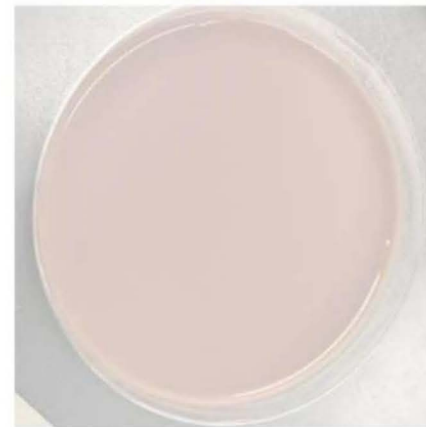

Haemophilus influenzae (ATCC#10211)/ ORC K

Supplementary Figure 17: Representative image of *H. influenzae* on chocolate agar medium after treatment with ORC K material showing no growth (count= 0 cfu).

mediXgraph

www.medixgraph.com CFU.Ai v1.4

Count : 0

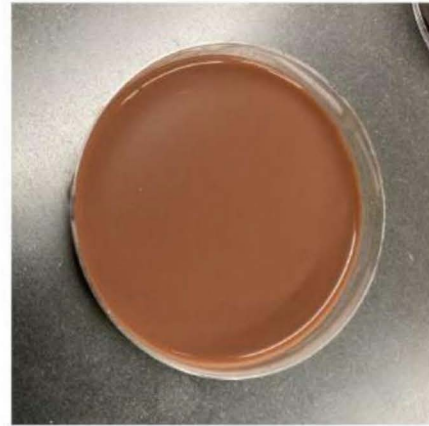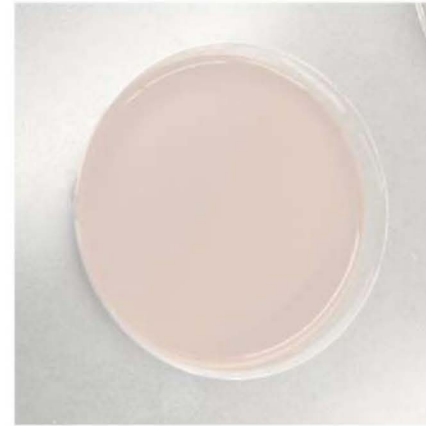

*Haemophilus influenzae* (ATCC#10211)/ ORC F

Supplementary Figure 18: Representative image of *H. influenzae* on chocolate agar medium after treatment with ORC F material showing no growth (count= 0 cfu).



mediXgraph

www.medixgraph.com CFU.Ai v1.4

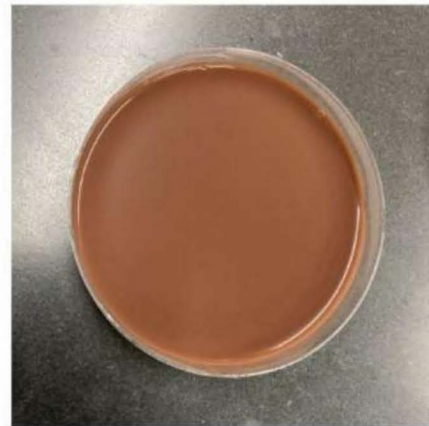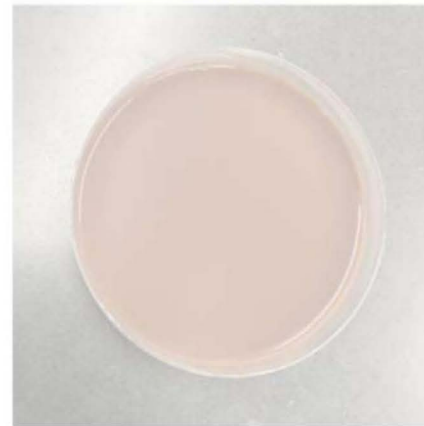

Haemophilus influenzae (ATCC#10211)/ ORC N

Supplementary Figure 19: Representative image of *H. influenzae* on chocolate agar medium after treatment with ORC N material showing no growth (count= 0 cfu).

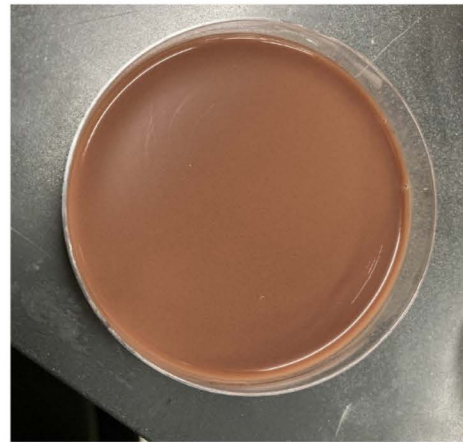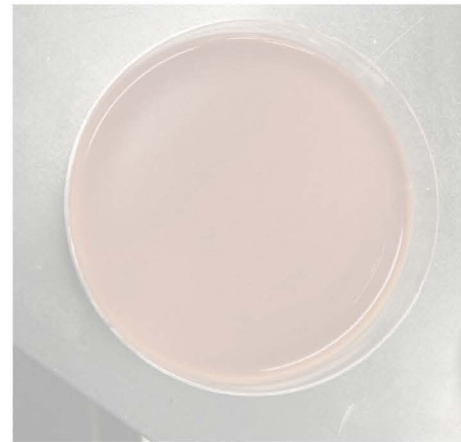

Haemophilus influenzae (ATCC#10211)/ ORC S

Supplementary Figure 20: Representative image of H. influenzae on chocolate agar medium after treatment with ORC S material showing no growth (count= 0 cfu).

mediXgraph

www.medixgraph.com CFU.Ai v1.4

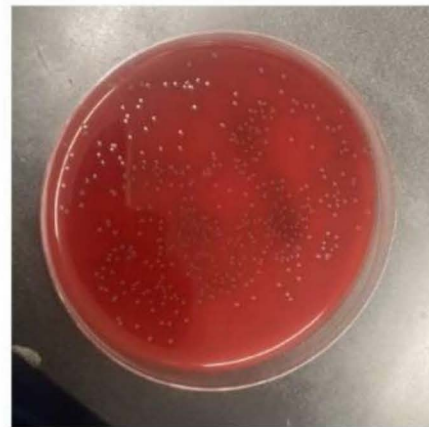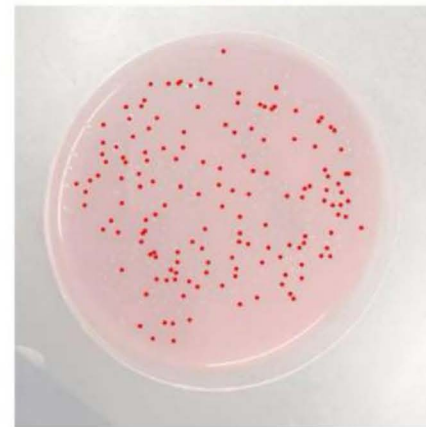

*Streptococcus agalactiae* (group B) (ATCC#12386)/ Control

Supplementary Figure 21: Representative image of *Streptococcus agalactiae* (*Strept. agalactiae*) on blood agar control medium showing growth of moderate number of CFUs (count= 156 cfu).

mediXgraph

www.medixgraph.com CFU.Ai v1.4

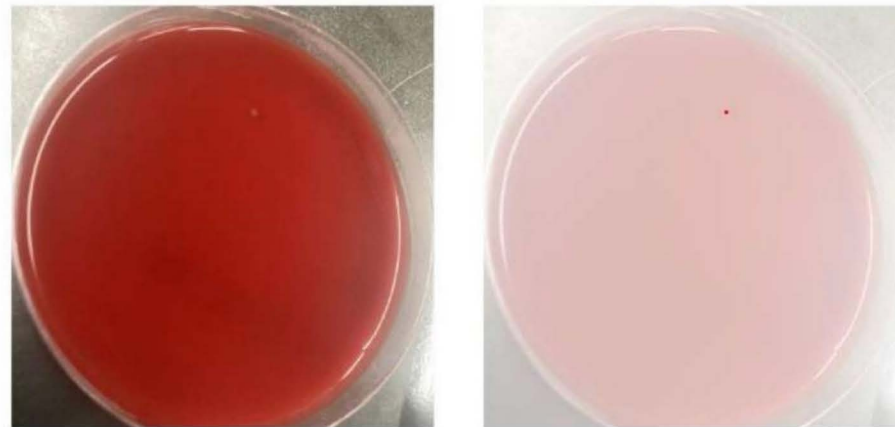

*Streptococcus agalactiae* (group B) (ATCC#12386)/ ORC K

Supplementary Figure 22: Representative image of *Strept. agalactiae* on blood agar medium after treatment with ORC K material showing very low growth (count= 1 cfu).

mediXgraph

www.medixgraph.com CFU.Ai v1.4

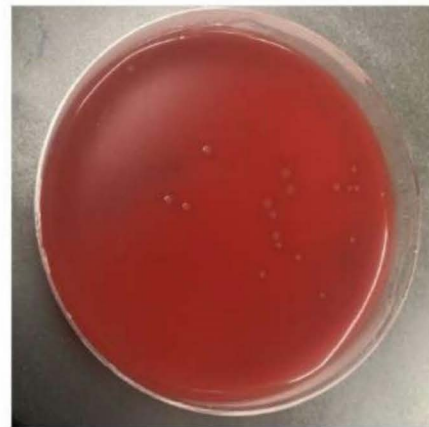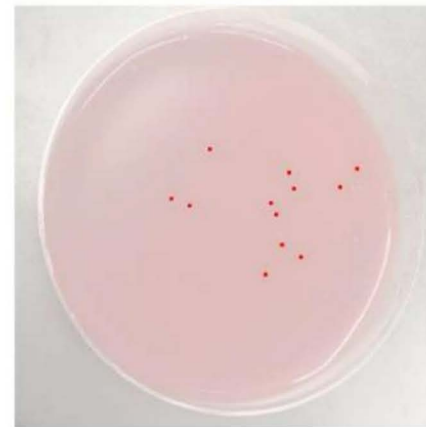

Count : 12

*Streptococcus agalactiae* (group B) (ATCC#12386)/ ORC F

Supplementary Figure 23: Representative image of *Strept. agalactiae* on blood agar medium after treatment with ORC F material showing low growth (count= 12 cfu).

mediXgraph

www.medixgraph.com CFU.Ai v1.4

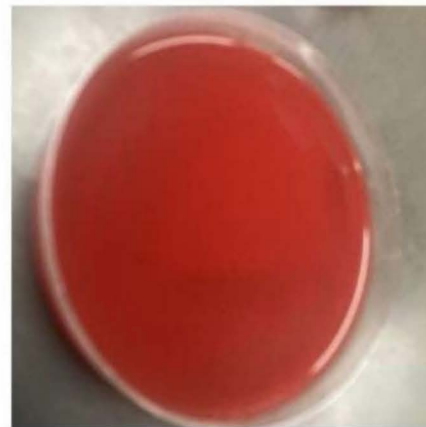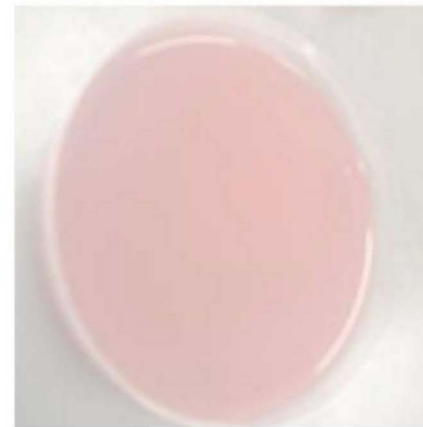

*Streptococcus agalactiae* (group B) (ATCC#12386)/ ORC N

Supplementary Figure 24: Representative image of *Strept. agalactiae* on blood agar medium after treatment with ORC N material showing no growth (count= 0 cfu).

mediXgraph

www.medixgraph.com CFU.Ai v1.4

Count : 0

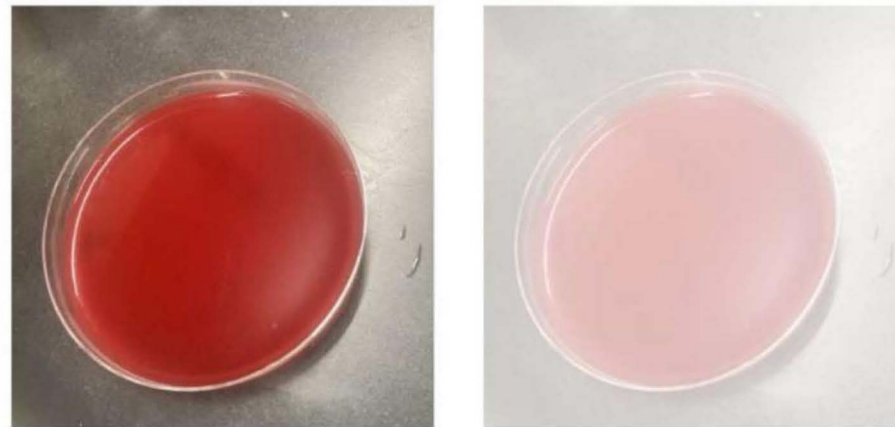

*Streptococcus agalactiae* (group B) (ATCC#12386)/ ORC S

Supplementary Figure 25: Representative image of *Strept. agalactiae* on blood agar medium after treatment with ORC S material showing no growth (count= 0 cfu).



mediXgraph

www.medixgraph.com CFU.Ai v1.4

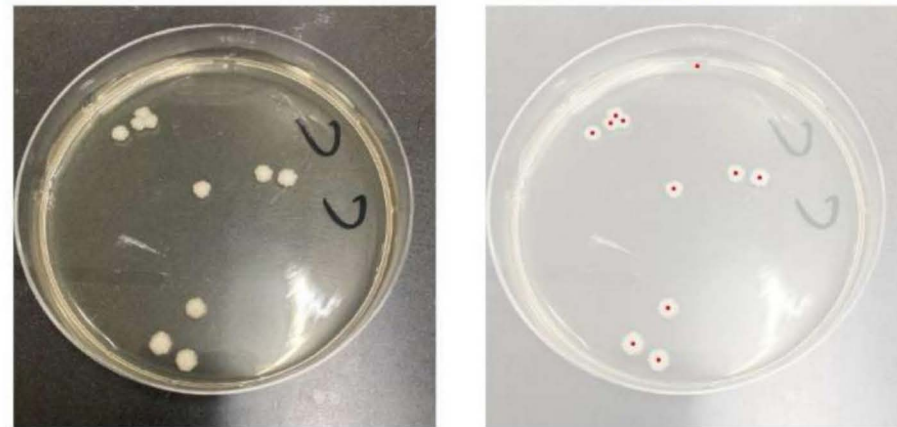

*Candida albicans* (ATCC#10231) / Control

Supplementary Figure 26: Representative image of *Candida albicans* on sabouraud dextrose agar (SDA) control medium showing growth of low number of CFUs (count= 11 cfu).

mediXgraph

www.medixgraph.com CFU.Ai v1.4

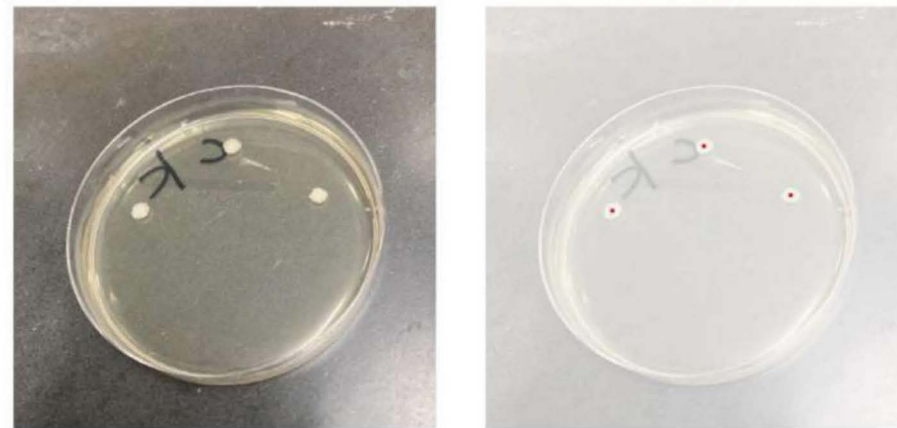

*Candida albicans* (ATCC#10231) / ORC K

Supplementary Figure 27: Representative image of *Candida albicans* on SDA after treatment with ORC K material showing growth of very low number of CFUs (count= 3 cfu).

mediXgraph

www.medixgraph.com CFU.Ai v1.4

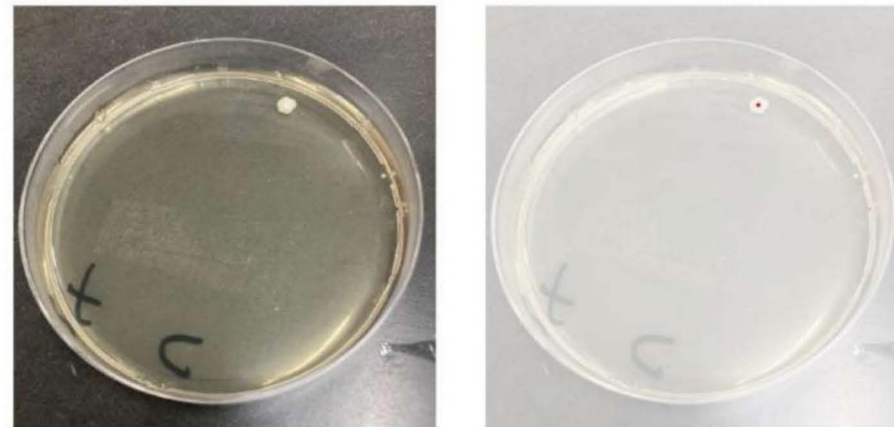

*Candida albicans* (ATCC#10231) / ORC F

Supplementary Figure 28: Representative image of *Candida albicans* on SDA after treatment with ORC F material showing growth of very low number of CFUs (count= 1 cfu).

mediXgraph

www.medixgraph.com CFU.Ai v1.4

Count : 4

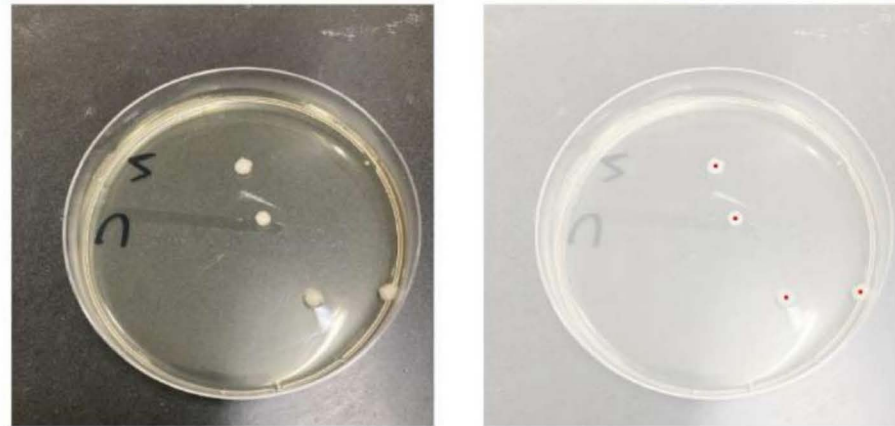

*Candida albicans* (ATCC#10231) / ORC N

Supplementary Figure 29: Representative image of *Candida albicans* on SDA after treatment with ORC N material showing growth of very low number of CFUs (count= 4 cfu).

mediXgraph

www.medixgraph.com CFU.Ai v1.4

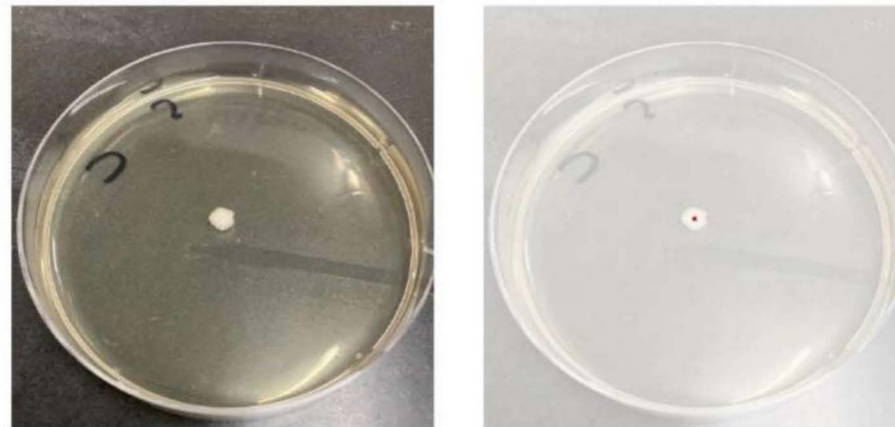

*Candida albicans* (ATCC#10231) / ORC S

Supplementary Figure 30: Representative image of *Candida albicans* on SDA after treatment with ORC S material showing growth of very low number of CFUs (count= 1 cfu).

mediXgraph

www.medixgraph.com CFU.Ai v1.4

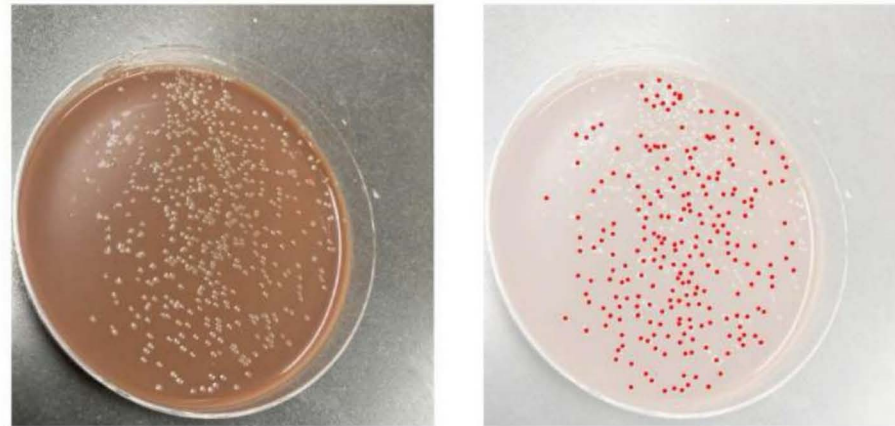

*Neisseria meningitidis* (ATCC#13090) /Control

Supplementary Figure 31: Representative image of *Neisseria meningitidis* (*N. meningitidis*) on chocolate agar control medium showing growth of high number of CFUs (count= 238 cfu).

mediXgraph

www.medixgraph.com CFU.Ai v1.4

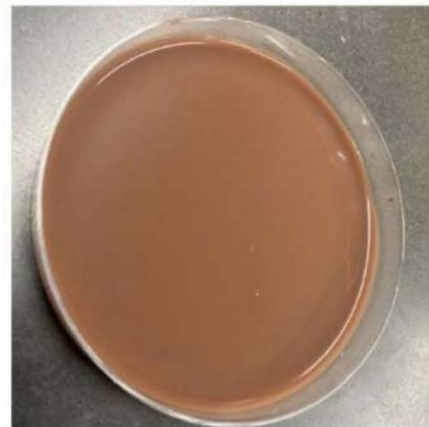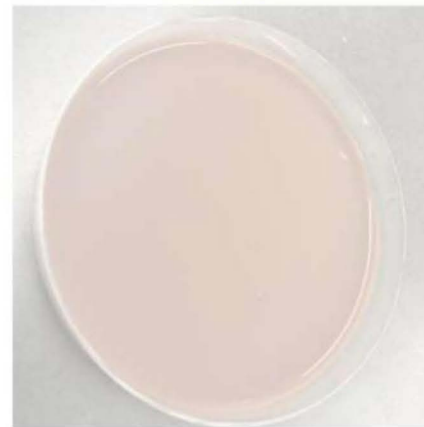

*Neisseria meningitidis* (ATCC#13090) /ORC K

Supplementary Figure 32: Representative image of *N. meningitidis* on chocolate agar medium after treatment with ORC K material showing no growth (count= 0 cfu).



mediXgraph

www.medixgraph.com CFU.Ai v1.4

Count : 0

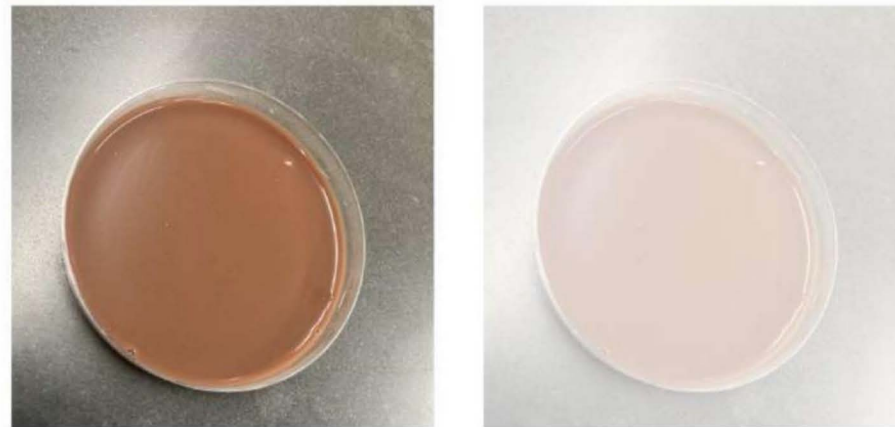

*Neisseria meningitidis* (ATCC#13090) /ORC F

Supplementary Figure 33: Representative image of *N. meningitidis* on chocolate agar medium after treatment with ORC F material showing no growth (count= 0 cfu).

mediXgraph

www.medixgraph.com CFU.Ai v1.4

Count : 0

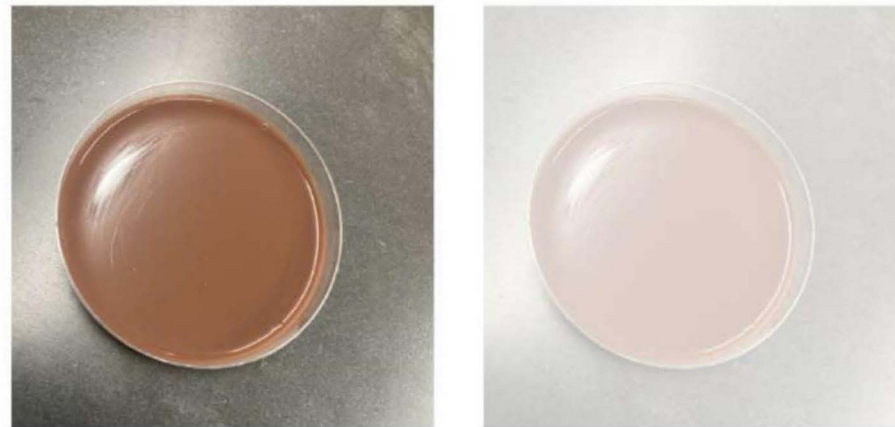

*Neisseria meningitidis* (ATCC#13090) /ORC N

Supplementary Figure 34: Representative image of *N. meningitidis* on chocolate agar medium after treatment with ORC N material showing no growth (count= 0 cfu).

mediXgraph

www.medixgraph.com CFU.Ai v1.4

Count : 0

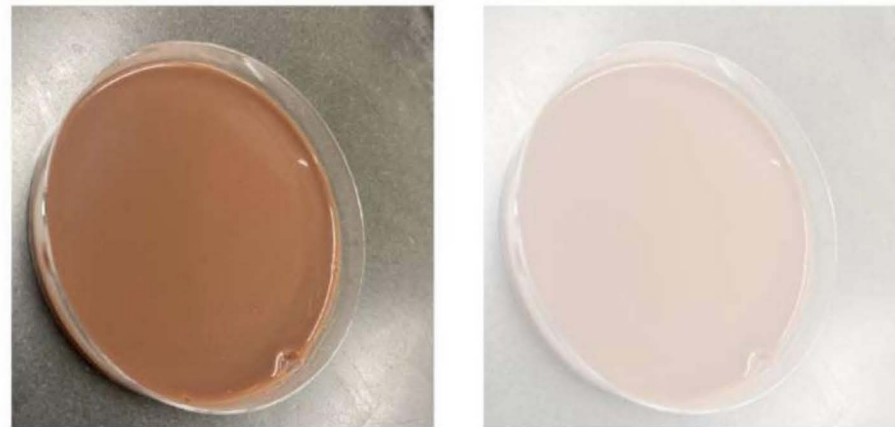

*Neisseria meningitidis* (ATCC#13090) /ORC S

Supplementary Figure 35: Representative image of *N. meningitidis* on chocolate agar medium after treatment with ORC S material showing no growth (count= 0 cfu).

mediXgraph

www.medixgraph.com CFU.Ai v1.4

Count : 161

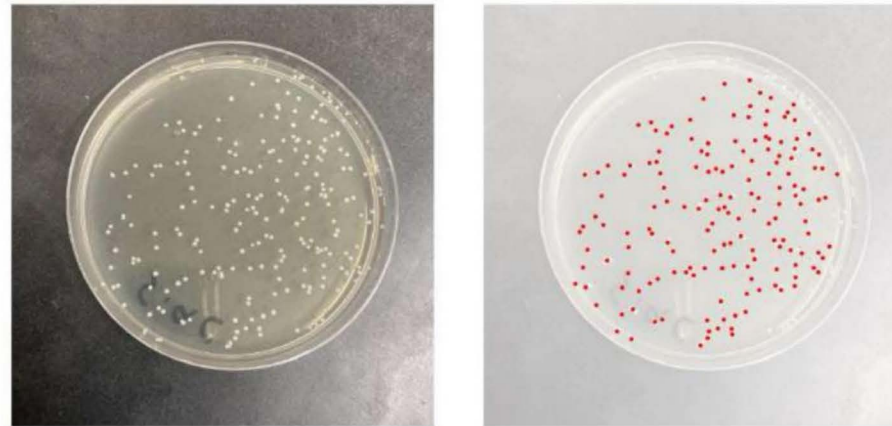

*Staphylococcus aureus* (ATCC#25923)/ Control

Supplementary Figure 36: Representative image of *Staphylococcus aureus* (Staph. aureus) on MHA control medium showing growth of moderate number of CFUs (count= 161 cfu).

mediXgraph

www.medixgraph.com CFU.Ai v1.4

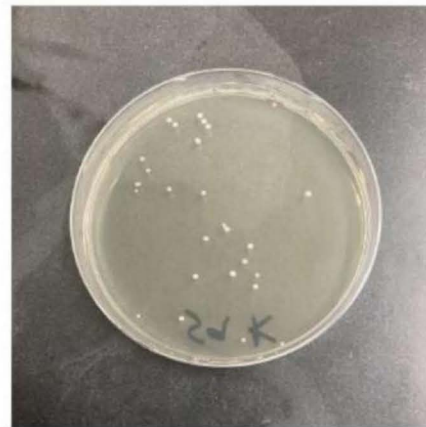

Count : 24

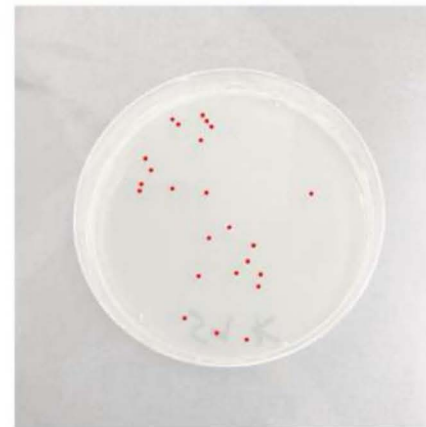

*Staphylococcus aureus* (ATCC#25923)/ ORC K

Supplementary Figure 37: Representative image of *Staph. aureus* on MHA after treatment with ORC K material showing growth of low number of CFUs (count= 24 cfu).

mediXgraph

www.medixgraph.com CFU.Ai v1.4

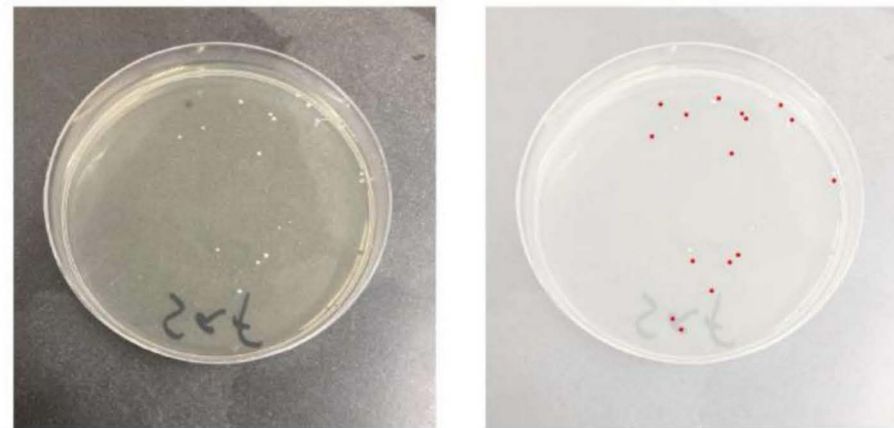

*Staphylococcus aureus* (ATCC#25923)/ ORC F

Supplementary Figure 38: Representative image of *Staph. aureus* on MHA after treatment with ORC F material showing growth of low number of CFUs (count= 16 cfu).

mediXgraph

www.medixgraph.com CFU.Ai v1.4

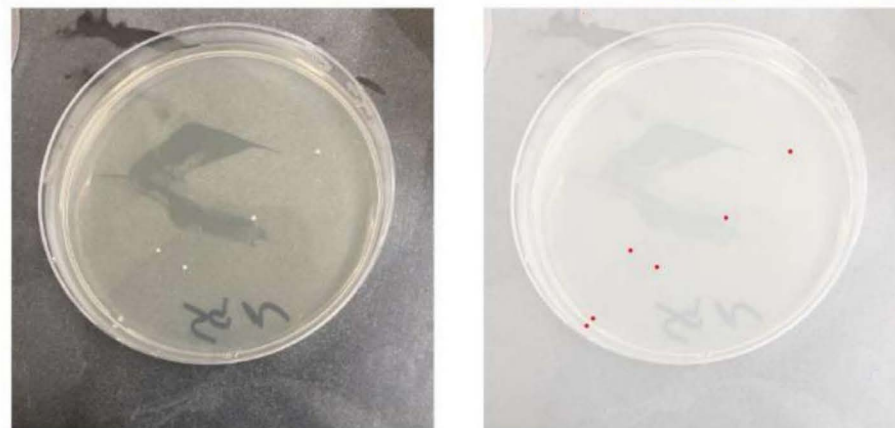

*Staphylococcus aureus* (ATCC#25923)/ ORC N

Supplementary Figure 39: Representative image of *Staph. aureus* on MHA after treatment with ORC N material showing growth of very low number of CFUs (count= 7 cfu).

mediXgraph

www.medixgraph.com CFU.Ai v1.4

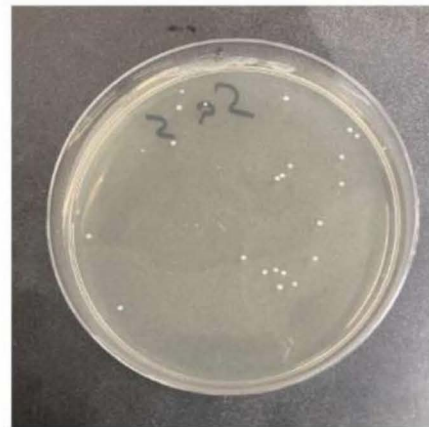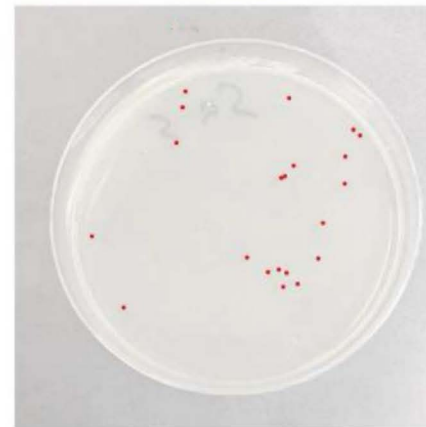

*Staphylococcus aureus* (ATCC#25923)/ ORC S

Supplementary Figure 40: Representative image of *Staph. aureus* on MHA after treatment with ORC S material showing growth of low number of CFUs (count= 22 cfu).



mediXgraph

www.medixgraph.com CFU.Ai v1.4

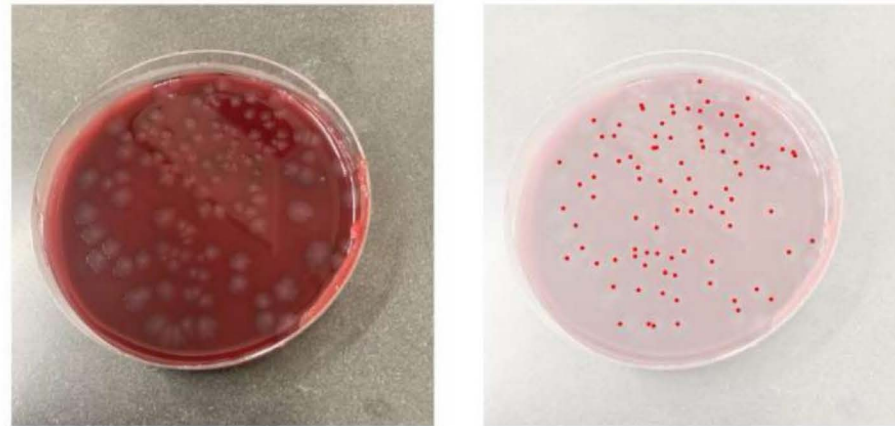

*Clostridium perfringens* (ATCC#13124)/ Control

Supplementary Figure 41: Representative image of *Clostridium perfringens* on blood agar control medium showing growth of low number of CFUs (count= 90 cfu).

mediXgraph

www.medixgraph.com CFU.Ai v1.4

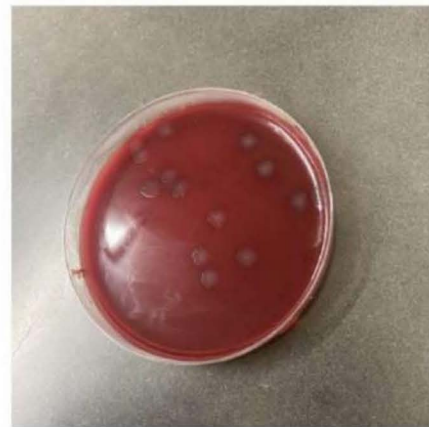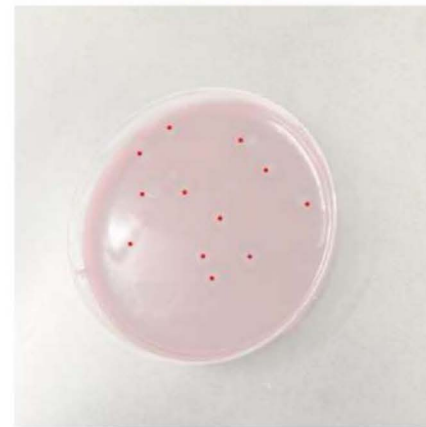

*Clostridium perfringens* (ATCC#13124)/ ORC K

Supplementary Figure 42: Representative image of *Clostridium perfringens* on blood agar medium after treatment with ORC K material showing growth of low number of CFUs (count= 12 cfu).

mediXgraph

www.medixgraph.com CFU.Ai v1.4

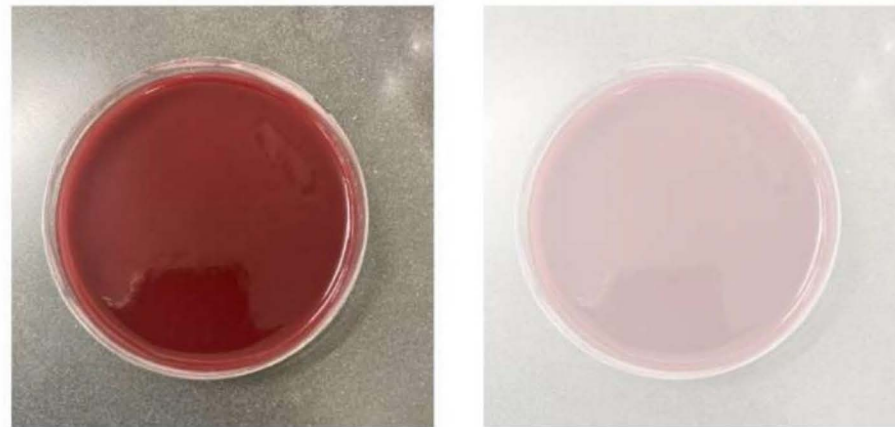

*Clostridium perfringens* (ATCC#13124)/ ORC F

Supplementary Figure 43: Representative image of *Clostridium perfringens* on blood agar medium after treatment with ORC F material showing no growth (count= 0 cfu).

mediXgraph

www.medixgraph.com CFU.Ai v1.4

Count : 0

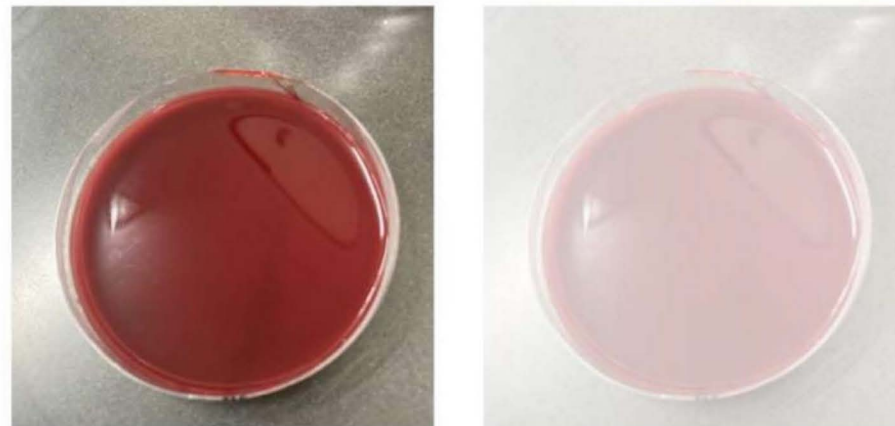

*Clostridium perfringens* (ATCC#13124)/ ORC N

Supplementary Figure 44: Representative image of *Clostridium perfringens* on blood agar medium after treatment with ORC N material showing no growth (count= 0 cfu).

mediXgraph

www.medixgraph.com CFU.Ai v1.4

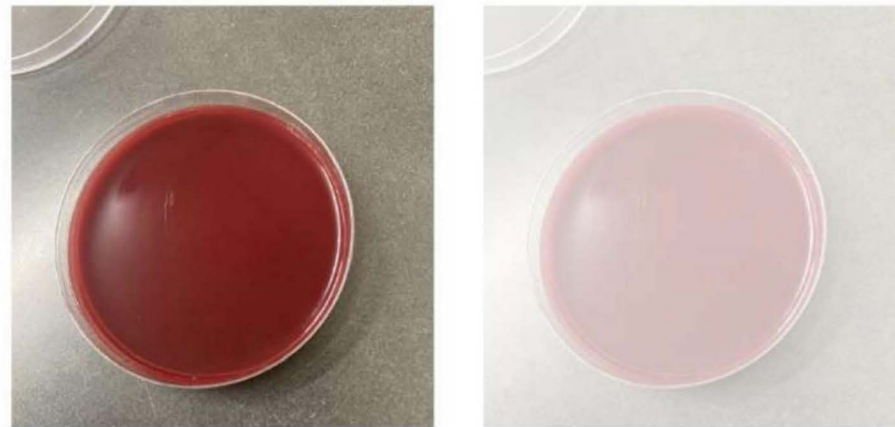

*Clostridium perfringens* (ATCC#13124)/ ORC S

Supplementary Figure 45: Representative image of *Clostridium perfringens* on blood agar medium after treatment with ORC S material showing no growth (count= 0 cfu).

mediXgraph

www.medixgraph.com CFU.Ai v1.4

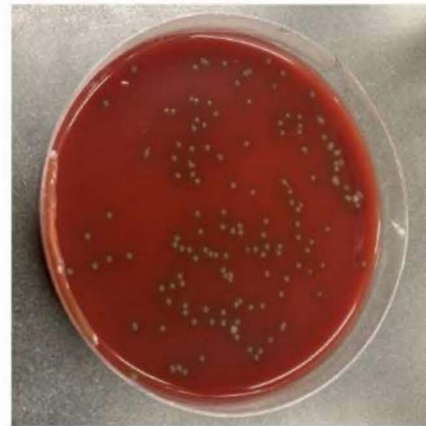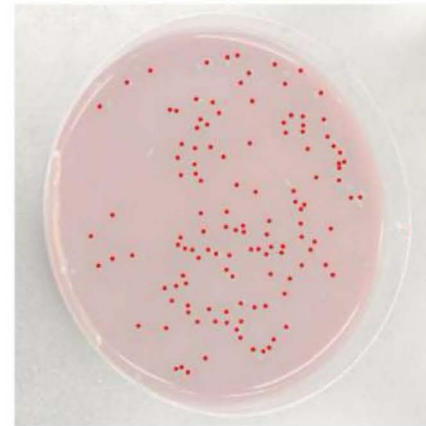

Pencillin-resistant *Streptococcus pneumoniae* / Control

Supplementary Figure 46: Representative image of Pencillin-resistant *Streptococcus pneumoniae* on blood agar control medium showing growth of moderate number of CFUs (count= 126 cfu).

mediXgraph

www.medixgraph.com CFU.Ai v1.4

Count : 0

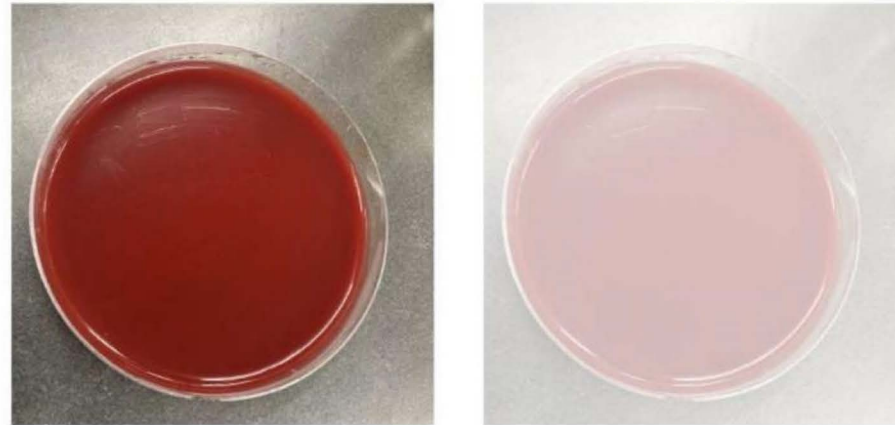

Pencillin-resistant *Streptococcus pneumoniae* / ORC K

Supplementary Figure 47: Representative image of Pencillin-resistant *Streptococcus pneumoniae* on blood agar medium after treatment with ORC K material showing no growth (count= 0 cfu).

mediXgraph

www.medixgraph.com CFU.Ai v1.4

Count : 0

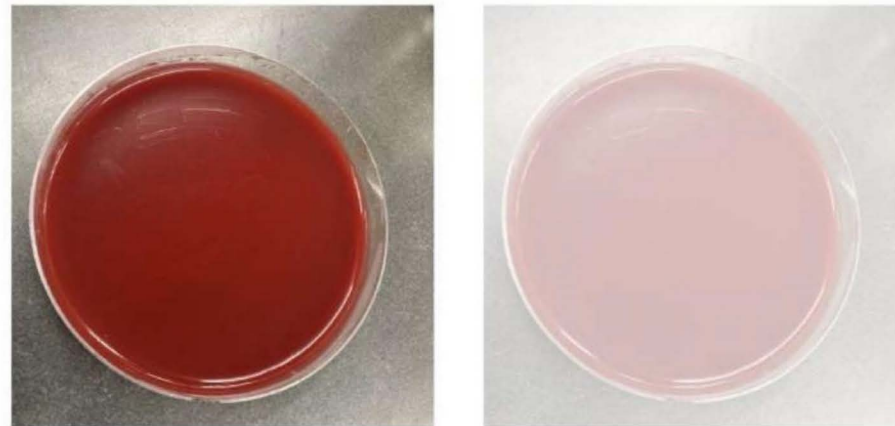

Pencillin-resistant *Streptococcus pneumoniae* / ORC F

Supplementary Figure 48: Representative image of Pencillin-resistant *Streptococcus pneumoniae* on blood agar medium after treatment with ORC F material showing no growth (count= 0 cfu).



mediXgraph

www.medixgraph.com CFU.Ai v1.4

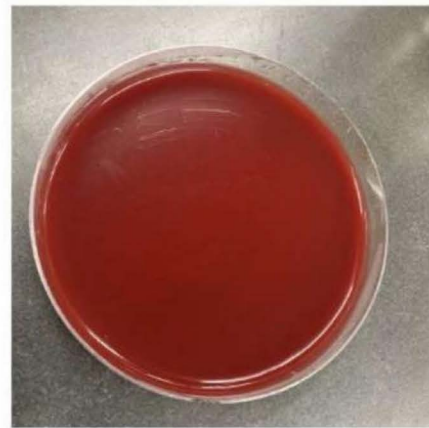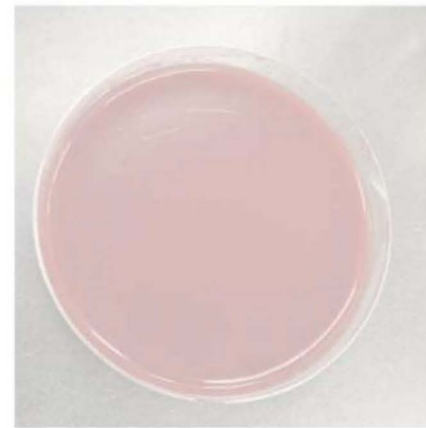

Count : 0

Pencillin resistant *Streptococcus pneumoniae* / ORC N

Supplementary Figure 49: Representative image of Pencillin-resistant *Streptococcus pneumoniae* on blood agar medium after treatment with ORC N material showing no growth (count= 0 cfu).

mediXgraph

www.medixgraph.com CFU.Ai v1.4

Count : 0



Pencillin-resistant *Streptococcus pneumoniae* / ORC S

Supplementary Figure 50: Representative image of Pencillin-resistant *Streptococcus pneumoniae* on blood agar medium after treatment with ORC S material showing no growth (count= 0 cfu).

mediXgraph

www.medixgraph.com CFU.Ai v1.4

Count : 213

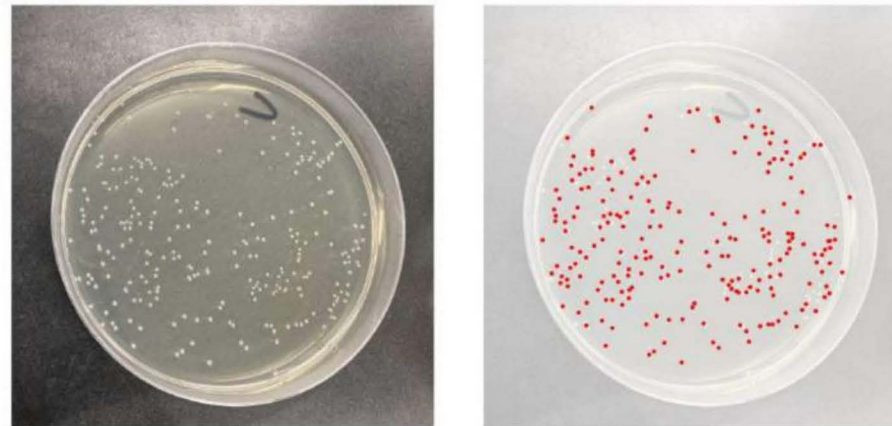

Vancomycin-resistant Enterococcus / Control

Supplementary Figure 51: Representative image of Vancomycin-resistant Enterococcus (VRE) on mueller hinton agar (MHA) control medium showing growth of high number of CFUs (count= 213 cfu).

mediXgraph

www.medixgraph.com CFU.Ai v1.4

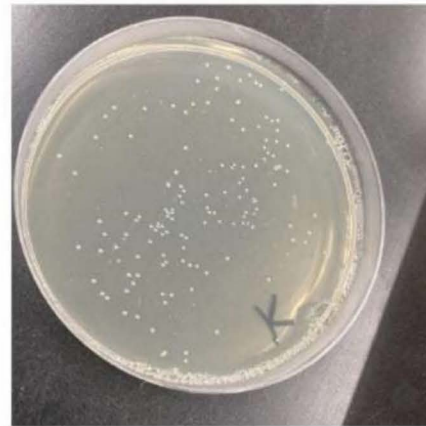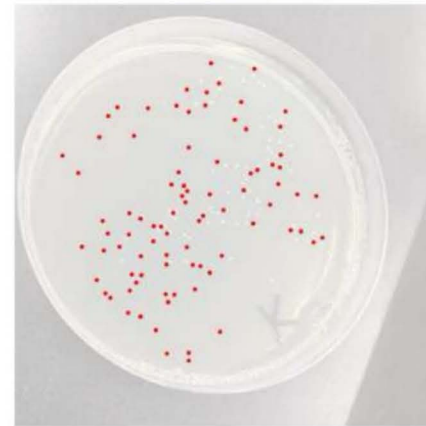

Count : 86

Vancomycin-resistant Enterococcus / ORC K

Supplementary Figure 52: Representative image of VRE on MHA after treatment with ORC K material showing growth of low number of CFUs (count= 86 cfu).

mediXgraph

www.medixgraph.com CFU.Ai v1.4

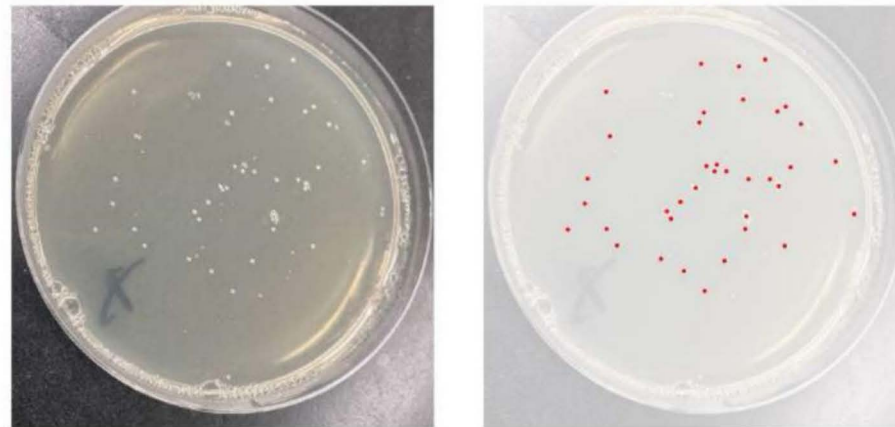

Vancomycin-resistant Enterococcus / ORC F

Supplementary Figure 53: Representative image of VRE on MHA after treatment with ORC F material showing growth of low number of CFUs (count= 37 cfu).

mediXgraph

www.medixgraph.com CFU.Ai v1.4

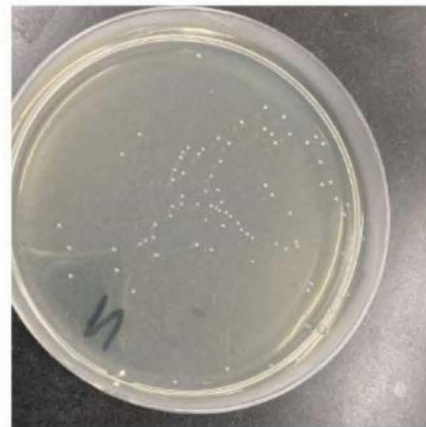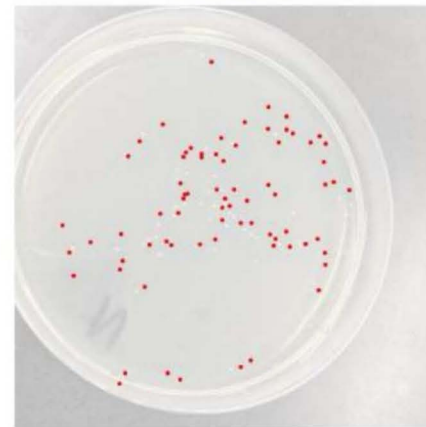

Vancomycin-resistant Enterococcus / ORC N

Supplementary Figure 54: Representative image of VRE on MHA after treatment with ORC N material showing growth of low number of CFUs (count= 73 cfu).

mediXgraph

www.medixgraph.com CFU.Ai v1.4

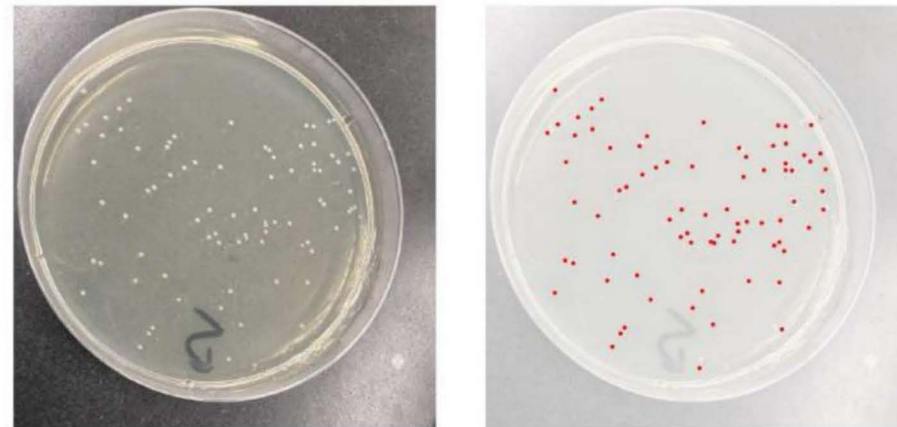

Vancomycin-resistant Enterococcus / ORC S

Supplementary Figure 55: Representative image of VRE on MHA after treatment with ORC S material showing growth of low number of CFUs (count= 78 cfu).
